# Supplementary material for: Histoepigenetic analysis of HPV- and tobacco-associated head and neck cancer identifies both subtype-specific and common therapeutic targets despite divergent microenvironments
Source: PubMed Central journal article supplement (PMC6756123; doi:10.1038/s41388-018-0659-4), 2019-01-17

### Supplementary Figure 3

a

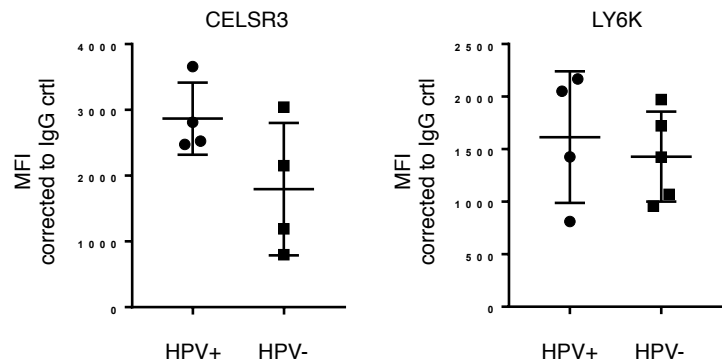

b

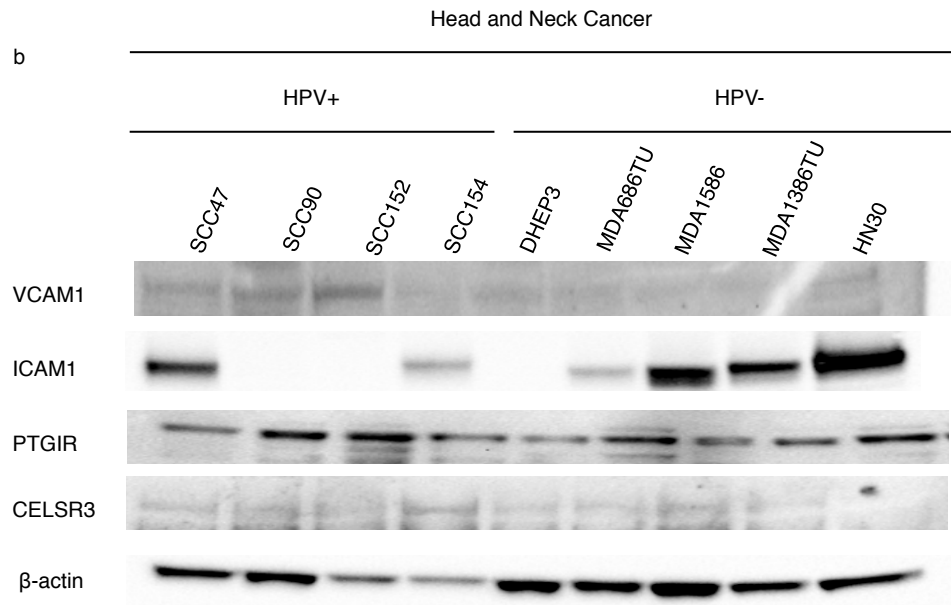

Supplement: 41388_2018_659_MOESM3_ESM.pdf [file 41388_2018_659_MOESM3_ESM.pdf]
